# Supplementary material for: Predicting Climate Change Effects on the Potential Distribution of Two Invasive Cryptic Species of the Bemisia tabaci Species Complex in China
Source: MDPI journal article supplement (doi:10.3390/insects13121081), 2022-11-23
Supplement: s1 [file s1]

## Supplementary Materials

**Table S1.** Detailed information for the occurrence records used in the MaxEnt models of MEAM1 and MED cryptic species of the *Bemisia tabaci* species complex in China.

| Cryptic species | Place of collection (Location, province) | Latitude | Longitude | Time of collection | Source <sup>1</sup> |
|-----------------|------------------------------------------|----------|-----------|--------------------|---------------------|
| MEAM1           | Xiqing, Tianjin                          | 38°53' N | 117°16' E | Aug. 2017          | Field surveys       |
| MEAM1           | Xinzhou, Shanxi                          | 39°11' N | 113°15' E | Jun. 2016          | Field surveys       |
| MEAM1           | Shenyang, Liaoning                       | 41°51' N | 123°25' E | Aug. 2016          | Field surveys       |
| MEAM1           | Dalian, Liaoning                         | 39°14' N | 121°43' E | Sep. 2016          | Field surveys       |
| MEAM1           | Dalian, Liaoning                         | 39°06' N | 121°42' E | Aug. 2017          | Field surveys       |
| MEAM1           | Liaoyang, Liaoning                       | 41°16' N | 123°09' E | Aug. 2016          | Field surveys       |
| MEAM1           | Siping, Jilin                            | 43°30' N | 124°48' E | Aug. 2017          | Field surveys       |
| MEAM1           | Harbin, Heilongjiang                     | 45°45' N | 126°35' E | Aug. 2017          | Field surveys       |
| MEAM1           | Jiamusi, Heilongjiang                    | 46°48' N | 130°22' E | Aug. 2017          | Field surveys       |
| MEAM1           | Qingpu, Shanghai                         | 31°06' N | 121°08' E | Sep. 2017          | Field surveys       |
| MEAM1           | Pudong, Shanghai                         | 30°59' N | 121°46' E | Aug. 2016          | Field surveys       |
| MEAM1           | Xuzhou, Jiangsu                          | 34°07' N | 117°21' E | Aug. 2016          | Field surveys       |
| MEAM1           | Suzhou, Jiangsu                          | 31°05' N | 120°26' E | Sep. 2017          | Field surveys       |
| MEAM1           | Wenzhou, Zhejiang                        | 27°57' N | 120°34' E | Aug. 2016          | Field surveys       |
| MEAM1           | Jinhua, Zhejiang                         | 29°03' N | 119°45' E | Aug. 2016          | Field surveys       |
| MEAM1           | Jinhua, Zhejiang                         | 29°02' N | 119°40' E | Aug. 2017          | Field surveys       |
| MEAM1           | Suzhou, Anhui                            | 33°37' N | 117°06' E | Aug. 2016          | Field surveys       |
| MEAM1           | Fuzhou, Fujian                           | 25°56' N | 119°15' E | Aug. 2016          | Field surveys       |
| MEAM1           | Fuzhou, Fujian                           | 25°58' N | 119°13' E | Aug. 2017          | Field surveys       |
| MEAM1           | Xiamen, Fujian                           | 24°39' N | 118°18' E | Aug. 2016          | Field surveys       |
| MEAM1           | Xiamen, Fujian                           | 24°38' N | 118°02' E | Aug. 2016          | Field surveys       |
| MEAM1           | Xiamen, Fujian                           | 24°37' N | 118°14' E | Aug. 2017          | Field surveys       |
| MEAM1           | Xiamen, Fujian                           | 24°35' N | 117°54' E | Jul. 2018          | Field surveys       |
| MEAM1           | Zhangzhou, Fujian                        | 24°07' N | 117°36' E | Jul. 2018          | Field surveys       |
| MEAM1           | Nanping, Fujian                          | 26°33' N | 118°07' E | Aug. 2016          | Field surveys       |
| MEAM1           | Luoyang, Henan                           | 33°44' N | 112°53' E | Aug. 2016          | Field surveys       |
| MEAM1           | Xinxiang, Henan                          | 35°17' N | 113°56' E | Aug. 2016          | Field surveys       |
| MEAM1           | Hengyang, Hunan                          | 26°58' N | 112°22' E | Aug. 2016          | Field surveys       |
| MEAM1           | Guangzhou, Guangdong                     | 23°09' N | 113°23' E | May. 2016          | Field surveys       |
| MEAM1           | Guangzhou, Guangdong                     | 23°09' N | 113°21' E | Jul. 2016          | Field surveys       |
| MEAM1           | Guangzhou, Guangdong                     | 23°00' N | 113°16' E | Dec. 2016          | Field surveys       |
| MEAM1           | Shenzhen, Guangdong                      | 22°42' N | 113°55' E | Jul. 2016          | Field surveys       |
| MEAM1           | Shenzhen, Guangdong                      | 22°31' N | 114°31' E | Jul. 2018          | Field surveys       |
| MEAM1           | Shantou, Guangdong                       | 23°16' N | 116°44' E | Jul. 2018          | Field surveys       |
| MEAM1           | Foshan, Guangdong                        | 23°30' N | 112°51' E | Jun. 2016          | Field surveys       |
| MEAM1           | Nanning, Guangxi                         | 22°51' N | 108°15' E | Jun. 2016          | Field surveys       |
| MEAM1           | Baise, Guangxi                           | 23°43' N | 106°48' E | Mar. 2016          | Field surveys       |
| MEAM1           | Haikou, Hainan                           | 20°00' N | 110°20' E | Jul. 2016          | Field surveys       |

|       |                    |          |           |           |                 |
|-------|--------------------|----------|-----------|-----------|-----------------|
| MEAM1 | Haikou, Hainan     | 19°40' N | 110°22' E | Sep. 2018 | Field surveys   |
| MEAM1 | Sanya, Hainan      | 18°18' N | 109°32' E | May. 2016 | Field surveys   |
| MEAM1 | Sanya, Hainan      | 18°19' N | 109°29' E | Feb. 2018 | Field surveys   |
| MEAM1 | Tunchang, Hainan   | 19°17' N | 110°05' E | Apr. 2018 | Field surveys   |
| MEAM1 | Chengmai, Hainan   | 19°44' N | 110°08' E | Aug. 2016 | Field surveys   |
| MEAM1 | Yuxi, Yunnan       | 23°41' N | 101°49' E | May. 2012 | Hu et al. 2014  |
| MEAM1 | Lincang, Yunnan    | 24°55' N | 100°08' E | Aug. 2012 | Hu et al. 2014  |
| MEAM1 | Chuxiong, Yunnan   | 25°49' N | 101°44' E | Sep. 2016 | Hu et al. 2018  |
| MEAM1 | Chuxiong, Yunnan   | 25°51' N | 101°46' E | Sep. 2016 | Hu et al. 2018  |
| MEAM1 | Chuxiong, Yunnan   | 25°42' N | 101°53' E | Sep. 2016 | Hu et al. 2018  |
| MEAM1 | Chuxiong, Yunnan   | 25°46' N | 101°51' E | Sep. 2016 | Hu et al. 2018  |
| MEAM1 | Chuxiong, Yunnan   | 25°43' N | 101°46' E | Nov. 2014 | Hu et al. 2018  |
| MEAM1 | Dehong, Yunnan     | 24°01' N | 97°51' E  | Oct. 2010 | Hu et al. 2014  |
| MEAM1 | Dehong, Yunnan     | 24°21' N | 98°34' E  | Oct. 2010 | Hu et al. 2014  |
| MEAM1 | Nujiang, Yunnan    | 27°39' N | 98°43' E  | Aug. 2016 | Hu et al. 2018  |
| MEAM1 | Lanzhou, Gansu     | 36°06' N | 103°41' E | Aug. 2018 | Field surveys   |
| MEAM1 | Tianshui, Gansu    | 34°42' N | 105°40' E | Aug. 2016 | Field surveys   |
| MEAM1 | Jiuquan, Gansu     | 40°31' N | 95°47' E  | Aug. 2016 | Field surveys   |
| MEAM1 | Jiuquan, Gansu     | 39°45' N | 98°32' E  | Aug. 2016 | Field surveys   |
| MEAM1 | Guyuan, Ningxia    | 36°06' N | 106°15' E | Aug. 2017 | Field surveys   |
| MEAM1 | Urumqi, Xinjiang   | 43°49' N | 87°34' E  | Aug. 2016 | Field surveys   |
| MEAM1 | Urumqi, Xinjiang   | 44°01' N | 87°26' E  | Aug. 2016 | Field surveys   |
| MEAM1 | Urumqi, Xinjiang   | 43°58' N | 87°25' E  | Jul. 2017 | Field surveys   |
| MEAM1 | Tulufan, Xinjiang  | 42°59' N | 89°09' E  | Jun. 2015 | Jia et al. 2021 |
| MEAM1 | Hami, Xinjiang     | 42°50' N | 93°27' E  | Apr. 2016 | Jia et al. 2021 |
| MEAM1 | Changji, Xinjiang  | 44°09' N | 88°01' E  | Mar. 2017 | Jia et al. 2021 |
| MEAM1 | Bayingol, Xinjiang | 38°07' N | 85°34' E  | Aug. 2016 | Jia et al. 2021 |
| MEAM1 | Bayingol, Xinjiang | 38°08' N | 85°30' E  | Aug. 2016 | Jia et al. 2021 |
| MEAM1 | Bayingol, Xinjiang | 41°46' N | 86°08' E  | Mar. 2016 | Jia et al. 2021 |
| MEAM1 | Kashi, Xinjiang    | 38°17' N | 77°11' E  | Aug. 2016 | Jia et al. 2021 |
| MEAM1 | Kashi, Xinjiang    | 39°24' N | 76°05' E  | Sep. 2015 | Jia et al. 2021 |
| MEAM1 | Kashi, Xinjiang    | 39°14' N | 76°22' E  | Sep. 2015 | Jia et al. 2021 |
| MEAM1 | Kashi, Xinjiang    | 38°55' N | 76°08' E  | Sep. 2015 | Jia et al. 2021 |
| MEAM1 | Kashi, Xinjiang    | 39°47' N | 78°31' E  | Sep. 2015 | Jia et al. 2021 |
| MEAM1 | Hetian, Xinjiang   | 37°27' N | 79°52' E  | Jun. 2015 | Jia et al. 2021 |
| MEAM1 | Hetian, Xinjiang   | 37°04' N | 82°42' E  | Aug. 2016 | Jia et al. 2021 |
| MEAM1 | Hetian, Xinjiang   | 36°50' N | 81°38' E  | Aug. 2016 | Jia et al. 2021 |
| MEAM1 | Hetian, Xinjiang   | 36°59' N | 81°04' E  | Aug. 2016 | Jia et al. 2021 |
| MEAM1 | Hetian, Xinjiang   | 36°59' N | 80°58' E  | Aug. 2016 | Jia et al. 2021 |
| MEAM1 | Hetian, Xinjiang   | 37°14' N | 79°41' E  | Aug. 2016 | Jia et al. 2021 |
| MEAM1 | Hetian, Xinjiang   | 37°17' N | 79°39' E  | Aug. 2016 | Jia et al. 2021 |
| MEAM1 | Hetian, Xinjiang   | 37°15' N | 80°05' E  | Apr. 2016 | Jia et al. 2021 |
| MEAM1 | Shihezi, Xinjiang  | 44°19' N | 86°03' E  | Aug. 2016 | Field surveys   |
| MEAM1 | Alaer, Xinjiang    | 40°32' N | 81°17' E  | Mar. 2017 | Jia et al. 2021 |

|     |                     |          |           |           |               |
|-----|---------------------|----------|-----------|-----------|---------------|
| MED | Tongzhou, Beijing   | 39°47' N | 116°45' E | Aug. 2017 | Field surveys |
| MED | Changping, Beijing  | 40°09' N | 116°13' E | Jul. 2017 | Field surveys |
| MED | Daxing, Beijing     | 39°38' N | 116°19' E | Jul. 2017 | Field surveys |
| MED | Shunyi, Beijing     | 40°01' N | 116°46' E | Aug. 2017 | Field surveys |
| MED | Haidian, Beijing    | 40°06' N | 116°13' E | Aug. 2017 | Field surveys |
| MED | Haidian, Beijing    | 40°01' N | 116°16' E | Oct. 2018 | Field surveys |
| MED | Beichen, Tianjin    | 39°13' N | 117°07' E | Aug. 2017 | Field surveys |
| MED | Wuqing, Tianjin     | 39°31' N | 116°58' E | Aug. 2017 | Field surveys |
| MED | Xiqing, Tianjin     | 38°53' N | 117°16' E | Aug. 2017 | Field surveys |
| MED | Dongli, Tianjin     | 39°03' N | 117°22' E | Aug. 2017 | Field surveys |
| MED | Binhai, Tianjin     | 38°45' N | 117°15' E | Jun. 2018 | Field surveys |
| MED | Shijiazhuang, Hebei | 38°08' N | 114°33' E | Aug. 2016 | Field surveys |
| MED | Shijiazhuang, Hebei | 38°21' N | 114°43' E | Jul. 2017 | Field surveys |
| MED | Shijiazhuang, Hebei | 38°00' N | 114°44' E | Jul. 2017 | Field surveys |
| MED | Shijiazhuang, Hebei | 38°00' N | 115°06' E | Jul. 2017 | Field surveys |
| MED | Tangshan, Hebei     | 39°21' N | 117°54' E | Aug. 2017 | Field surveys |
| MED | Tangshan, Hebei     | 39°48' N | 118°10' E | Aug. 2017 | Field surveys |
| MED | Tangshan, Hebei     | 39°51' N | 118°46' E | Aug. 2017 | Field surveys |
| MED | Xingtai, Hebei      | 37°36' N | 114°43' E | Jul. 2017 | Field surveys |
| MED | Xingtai, Hebei      | 37°17' N | 114°33' E | Jul. 2017 | Field surveys |
| MED | Xingtai, Hebei      | 37°00' N | 115°16' E | Jul. 2017 | Field surveys |
| MED | Xingtai, Hebei      | 37°01' N | 114°40' E | Jul. 2018 | Field surveys |
| MED | Baoding, Hebei      | 39°03' N | 115°35' E | Sep. 2016 | Field surveys |
| MED | Baoding, Hebei      | 39°00' N | 116°06' E | Sep. 2016 | Field surveys |
| MED | Baoding, Hebei      | 38°56' N | 115°56' E | Sep. 2016 | Field surveys |
| MED | Baoding, Hebei      | 39°02' N | 115°52' E | Sep. 2016 | Field surveys |
| MED | Baoding, Hebei      | 38°42' N | 115°47' E | Sep. 2016 | Field surveys |
| MED | Baoding, Hebei      | 38°39' N | 115°28' E | Aug. 2016 | Field surveys |
| MED | Baoding, Hebei      | 39°10' N | 115°35' E | Jul. 2017 | Field surveys |
| MED | Baoding, Hebei      | 38°57' N | 115°26' E | Jul. 2017 | Field surveys |
| MED | Baoding, Hebei      | 38°40' N | 115°08' E | Jul. 2017 | Field surveys |
| MED | Zhangjiakou, Hebei  | 40°26' N | 115°23' E | Jun. 2018 | Field surveys |
| MED | Chengde, Hebei      | 40°53' N | 117°47' E | Sep. 2016 | Field surveys |
| MED | Chengde, Hebei      | 40°54' N | 117°53' E | Sep. 2016 | Field surveys |
| MED | Cangzhou, Hebei     | 38°06' N | 117°34' E | Jun. 2018 | Field surveys |
| MED | Handan, Hebei       | 36°23' N | 114°21' E | Jul. 2018 | Field surveys |
| MED | Langfang, Hebei     | 39°30' N | 116°36' E | Jul. 2016 | Field surveys |
| MED | Hengshui, Hebei     | 38°05' N | 115°34' E | Aug. 2016 | Field surveys |
| MED | Hengshui, Hebei     | 38°07' N | 115°36' E | Aug. 2016 | Field surveys |
| MED | Taiyuan, Shanxi     | 38°04' N | 112°40' E | Sep. 2016 | Field surveys |
| MED | Datong, Shanxi      | 40°02' N | 113°17' E | Aug. 2017 | Field surveys |
| MED | Yuncheng, Shanxi    | 35°43' N | 111°08' E | Sep. 2017 | Field surveys |
| MED | Xinzhou, Shanxi     | 39°11' N | 113°15' E | Jun. 2016 | Field surveys |
| MED | Linfen, Shanxi      | 36°08' N | 111°26' E | Aug. 2017 | Field surveys |

|     |                           |          |           |           |               |
|-----|---------------------------|----------|-----------|-----------|---------------|
| MED | Linfen, Shanxi            | 36°03' N | 111°35' E | Aug. 2017 | Field surveys |
| MED | Lvliang, Shanxi           | 37°09' N | 111°47' E | Sep. 2018 | Field surveys |
| MED | Hohhot, Inner Mongolia    | 40°42' N | 111°50' E | Aug. 2016 | Field surveys |
| MED | Chifeng, Inner Mongolia   | 42°13' N | 119°02' E | Sep. 2016 | Field surveys |
| MED | Chifeng, Inner Mongolia   | 42°15' N | 118°58' E | Sep. 2016 | Field surveys |
| MED | Tongliao, Inner Mongolia  | 43°33' N | 120°56' E | Sep. 2016 | Field surveys |
| MED | Tongliao, Inner Mongolia  | 43°36' N | 121°18' E | Sep. 2016 | Field surveys |
| MED | Bayan Nur, Inner Mongolia | 40°55' N | 107°26' E | Aug. 2016 | Field surveys |
| MED | Shenyang, Liaoning        | 41°49' N | 123°33' E | Aug. 2017 | Field surveys |
| MED | Dalian, Liaoning          | 39°14' N | 121°43' E | Sep. 2016 | Field surveys |
| MED | Dalian, Liaoning          | 39°06' N | 121°42' E | Aug. 2017 | Field surveys |
| MED | Liaoyang, Liaoning        | 41°16' N | 123°09' E | Aug. 2016 | Field surveys |
| MED | Changchun, Jilin          | 43°48' N | 125°24' E | Aug. 2017 | Field surveys |
| MED | Siping, Jilin             | 43°30' N | 124°48' E | Aug. 2017 | Field surveys |
| MED | Harbin, Heilongjiang      | 45°51' N | 126°28' E | Jul. 2016 | Field surveys |
| MED | Harbin, Heilongjiang      | 45°44' N | 126°43' E | Aug. 2017 | Field surveys |
| MED | Jiamusi, Heilongjiang     | 46°48' N | 130°24' E | Aug. 2016 | Field surveys |
| MED | Mudanjiang, Heilongjiang  | 44°25' N | 129°30' E | Aug. 2017 | Field surveys |
| MED | Qingpu, Shanghai          | 31°07' N | 121°09' E | Aug. 2016 | Field surveys |
| MED | Pudong, Shanghai          | 30°59' N | 121°46' E | Aug. 2016 | Field surveys |
| MED | Xuzhou, Jiangsu           | 34°15' N | 117°23' E | Aug. 2016 | Field surveys |
| MED | Xuzhou, Jiangsu           | 34°07' N | 117°21' E | Aug. 2016 | Field surveys |
| MED | Suzhou, Jiangsu           | 31°05' N | 120°26' E | Sep. 2017 | Field surveys |
| MED | Suzhou, Jiangsu           | 31°08' N | 120°29' E | Sep. 2017 | Field surveys |
| MED | Nantong, Jiangsu          | 31°55' N | 121°08' E | Jul. 2018 | Field surveys |
| MED | Lianyungang, Jiangsu      | 34°36' N | 119°18' E | Aug. 2016 | Field surveys |
| MED | Lianyungang, Jiangsu      | 34°46' N | 119°06' E | Aug. 2016 | Field surveys |
| MED | Huaian, Jiangsu           | 33°30' N | 119°06' E | Aug. 2016 | Field surveys |
| MED | Hangzhou, Zhejiang        | 30°12' N | 120°05' E | Aug. 2016 | Field surveys |
| MED | Hangzhou, Zhejiang        | 30°06' N | 120°04' E | Aug. 2017 | Field surveys |
| MED | Hangzhou, Zhejiang        | 30°02' N | 120°11' E | Sep. 2017 | Field surveys |
| MED | Wenzhou, Zhejiang         | 27°57' N | 120°34' E | Aug. 2016 | Field surveys |
| MED | Wenzhou, Zhejiang         | 28°04' N | 120°41' E | Aug. 2016 | Field surveys |
| MED | Wenzhou, Zhejiang         | 27°56' N | 120°33' E | Aug. 2017 | Field surveys |
| MED | Wenzhou, Zhejiang         | 28°05' N | 120°30' E | Jul. 2018 | Field surveys |
| MED | Jinhua, Zhejiang          | 29°05' N | 119°39' E | Aug. 2016 | Field surveys |
| MED | Jinhua, Zhejiang          | 29°03' N | 119°45' E | Aug. 2016 | Field surveys |
| MED | Jinhua, Zhejiang          | 29°02' N | 119°40' E | Aug. 2017 | Field surveys |
| MED | Jinhua, Zhejiang          | 29°00' N | 119°38' E | Aug. 2017 | Field surveys |
| MED | Hefei, Anhui              | 31°53' N | 117°28' E | Aug. 2016 | Field surveys |
| MED | Wuhu, Anhui               | 31°22' N | 118°23' E | Aug. 2016 | Field surveys |
| MED | Wuhu, Anhui               | 31°25' N | 118°17' E | Sep. 2017 | Field surveys |
| MED | Fuyang, Anhui             | 33°08' N | 115°36' E | Jul. 2018 | Field surveys |
| MED | Suzhou, Anhui             | 33°37' N | 117°06' E | Aug. 2016 | Field surveys |

|     |                     |          |           |           |               |
|-----|---------------------|----------|-----------|-----------|---------------|
| MED | Bozhou, Anhui       | 33°50' N | 115°46' E | Sep. 2017 | Field surveys |
| MED | Chizhou, Anhui      | 30°39' N | 117°23' E | Aug. 2016 | Field surveys |
| MED | Fuzhou, Fujian      | 25°56' N | 119°14' E | Aug. 2016 | Field surveys |
| MED | Fuzhou, Fujian      | 25°58' N | 119°13' E | Aug. 2017 | Field surveys |
| MED | Xiamen, Fujian      | 24°39' N | 118°18' E | Aug. 2016 | Field surveys |
| MED | Xiamen, Fujian      | 24°37' N | 118°14' E | Aug. 2017 | Field surveys |
| MED | Xiamen, Fujian      | 24°35' N | 117°54' E | Jul. 2018 | Field surveys |
| MED | Sanming, Fujian     | 26°16' N | 117°38' E | Aug. 2016 | Field surveys |
| MED | Sanming, Fujian     | 26°26' N | 117°41' E | Aug. 2017 | Field surveys |
| MED | Sanming, Fujian     | 26°29' N | 117°43' E | Aug. 2017 | Field surveys |
| MED | Zhangzhou, Fujian   | 24°07' N | 117°36' E | Jul. 2018 | Field surveys |
| MED | Nanchang, Jiangxi   | 28°43' N | 115°54' E | Aug. 2016 | Field surveys |
| MED | Pingxiang, Jiangxi  | 27°07' N | 113°57' E | Oct. 2018 | Field surveys |
| MED | Jiujiang, Jiangxi   | 29°44' N | 116°07' E | Aug. 2017 | Field surveys |
| MED | Ganzhou, Jiangxi    | 25°52' N | 114°57' E | Aug. 2017 | Field surveys |
| MED | Yichun, Jiangxi     | 28°24' N | 114°47' E | Jul. 2018 | Field surveys |
| MED | Fuzhou, Jiangxi     | 27°46' N | 116°04' E | Oct. 2018 | Field surveys |
| MED | Jinan, Shandong     | 36°41' N | 117°23' E | Aug. 2016 | Field surveys |
| MED | Qingdao, Shandong   | 36°12' N | 120°35' E | Jul. 2018 | Field surveys |
| MED | Zaozhuang, Shandong | 34°45' N | 117°25' E | Aug. 2017 | Field surveys |
| MED | Zaozhuang, Shandong | 34°53' N | 117°37' E | Aug. 2017 | Field surveys |
| MED | Dongying, Shandong  | 37°33' N | 118°15' E | Aug. 2016 | Field surveys |
| MED | Dongying, Shandong  | 37°18' N | 118°28' E | Jun. 2018 | Field surveys |
| MED | Yantai, Shandong    | 36°40' N | 120°45' E | Jul. 2018 | Field surveys |
| MED | Weifang, Shandong   | 36°54' N | 118°49' E | Jun. 2018 | Field surveys |
| MED | Taian, Shandong     | 35°57' N | 117°15' E | Aug. 2016 | Field surveys |
| MED | Taian, Shandong     | 36°12' N | 116°47' E | Aug. 2016 | Field surveys |
| MED | Linyi, Shandong     | 35°06' N | 118°21' E | Sep. 2018 | Field surveys |
| MED | Dezhou, Shandong    | 37°24' N | 116°17' E | Aug. 2016 | Field surveys |
| MED | Dezhou, Shandong    | 37°22' N | 116°18' E | Aug. 2016 | Field surveys |
| MED | Dezhou, Shandong    | 37°23' N | 116°23' E | Aug. 2017 | Field surveys |
| MED | Dezhou, Shandong    | 37°28' N | 116°18' E | Aug. 2017 | Field surveys |
| MED | Binzhou, Shandong   | 37°32' N | 117°52' E | Aug. 2017 | Field surveys |
| MED | Binzhou, Shandong   | 37°39' N | 117°48' E | Jun. 2018 | Field surveys |
| MED | Zhengzhou, Henan    | 34°55' N | 113°36' E | Aug. 2016 | Field surveys |
| MED | Luoyang, Henan      | 33°44' N | 112°53' E | Aug. 2016 | Field surveys |
| MED | Luoyang, Henan      | 33°01' N | 112°25' E | Aug. 2016 | Field surveys |
| MED | Luoyang, Henan      | 34°33' N | 112°13' E | Sep. 2018 | Field surveys |
| MED | Anyang, Henan       | 35°58' N | 114°22' E | Jul. 2017 | Field surveys |
| MED | Anyang, Henan       | 36°08' N | 113°53' E | Jul. 2017 | Field surveys |
| MED | Anyang, Henan       | 36°01' N | 114°52' E | Jul. 2017 | Field surveys |
| MED | Hebi, Henan         | 35°41' N | 114°17' E | Jul. 2017 | Field surveys |
| MED | Xinxiang, Henan     | 35°17' N | 113°56' E | Aug. 2016 | Field surveys |
| MED | Xinxiang, Henan     | 35°10' N | 113°48' E | Aug. 2016 | Field surveys |

|     |                    |          |           |           |                |
|-----|--------------------|----------|-----------|-----------|----------------|
| MED | Xinxiang, Henan    | 34°57' N | 114°14' E | Jul. 2017 | Field surveys  |
| MED | Xinxiang, Henan    | 35°27' N | 114°05' E | Jul. 2017 | Field surveys  |
| MED | Xinxiang, Henan    | 34°56' N | 114°30' E | Jul. 2018 | Field surveys  |
| MED | Xinxiang, Henan    | 35°24' N | 113°58' E | Jul. 2018 | Field surveys  |
| MED | Xinxiang, Henan    | 35°32' N | 114°06' E | Jul. 2018 | Field surveys  |
| MED | Xuchang, Henan     | 33°53' N | 111°29' E | Sep. 2018 | Field surveys  |
| MED | Nanyang, Henan     | 32°25' N | 112°18' E | Aug. 2016 | Field surveys  |
| MED | Wuhan, Hubei       | 30°33' N | 114°08' E | Aug. 2016 | Field surveys  |
| MED | Wuhan, Hubei       | 30°26' N | 114°08' E | Aug. 2016 | Field surveys  |
| MED | Wuhan, Hubei       | 30°28' N | 114°21' E | Sep. 2017 | Field surveys  |
| MED | Xiangyang, Hubei   | 32°05' N | 112°17' E | Aug. 2016 | Field surveys  |
| MED | Xiangyang, Hubei   | 32°04' N | 112°13' E | Sep. 2017 | Field surveys  |
| MED | Huanggang, Hubei   | 29°53' N | 115°59' E | Aug. 2016 | Field surveys  |
| MED | Suizhou, Hubei     | 31°51' N | 113°18' E | Aug. 2016 | Field surveys  |
| MED | Suizhou, Hubei     | 31°44' N | 113°16' E | Aug. 2016 | Field surveys  |
| MED | Suizhou, Hubei     | 31°39' N | 113°12' E | Sep. 2017 | Field surveys  |
| MED | Changsha, Hunan    | 28°10' N | 113°07' E | Aug. 2016 | Field surveys  |
| MED | Changsha, Hunan    | 28°05' N | 112°58' E | Aug. 2017 | Field surveys  |
| MED | Hengyang, Hunan    | 26°58' N | 112°32' E | Aug. 2017 | Field surveys  |
| MED | Yueyang, Hunan     | 29°16' N | 113°06' E | Aug. 2016 | Field surveys  |
| MED | Yueyang, Hunan     | 29°18' N | 113°06' E | Aug. 2016 | Field surveys  |
| MED | Huaihua, Hunan     | 27°34' N | 109°58' E | Aug. 2017 | Field surveys  |
| MED | Shantou, Guangdong | 23°16' N | 116°44' E | Jul. 2018 | Field surveys  |
| MED | Heyuan, Guangdong  | 23°58' N | 114°46' E | Nov. 2017 | Field surveys  |
| MED | Nanning, Guangxi   | 22°51' N | 108°15' E | Jun. 2016 | Field surveys  |
| MED | Liuzhou, Guangxi   | 24°11' N | 109°25' E | Jan. 2018 | Field surveys  |
| MED | Baise, Guangxi     | 23°43' N | 106°48' E | Mar. 2016 | Field surveys  |
| MED | Hechi, Guangxi     | 24°28' N | 108°39' E | Jan. 2018 | Field surveys  |
| MED | Haikou, Hainan     | 20°00' N | 110°20' E | Jul. 2016 | Field surveys  |
| MED | Sanya, Hainan      | 18°18' N | 109°32' E | May. 2016 | Field surveys  |
| MED | Chengmai, Hainan   | 19°44' N | 110°08' E | Aug. 2016 | Field surveys  |
| MED | Tongnan, Chongqing | 30°09' N | 105°49' E | Aug. 2016 | Field surveys  |
| MED | Tongnan, Chongqing | 30°04' N | 105°49' E | Aug. 2016 | Field surveys  |
| MED | Beibei, Chongqing  | 29°49' N | 106°26' E | Jun. 2016 | Field surveys  |
| MED | Hechuan, Chongqing | 30°03' N | 106°18' E | Jun. 2016 | Field surveys  |
| MED | Chengdu, Sichuan   | 30°49' N | 104°21' E | Aug. 2016 | Field surveys  |
| MED | Chengdu, Sichuan   | 30°41' N | 104°18' E | Aug. 2016 | Field surveys  |
| MED | Deyang, Sichuan    | 31°18' N | 104°21' E | Aug. 2016 | Field surveys  |
| MED | Deyang, Sichuan    | 31°16' N | 104°21' E | Aug. 2016 | Field surveys  |
| MED | Leshan, Sichuan    | 29°41' N | 103°38' E | Aug. 2016 | Field surveys  |
| MED | Yuxi, Yunnan       | 24°13' N | 103°06' E | May. 2012 | Hu et al. 2014 |
| MED | Boshan, Yunnan     | 24°10' N | 98°48' E  | Oct. 2010 | Hu et al. 2014 |
| MED | Boshan, Yunnan     | 25°01' N | 99°01' E  | Oct. 2010 | Hu et al. 2014 |
| MED | Puer, Yunnan       | 22°47' N | 101°07' E | Aug. 2012 | Hu et al. 2014 |

|     |                       |          |           |           |                |
|-----|-----------------------|----------|-----------|-----------|----------------|
| MED | Lincang, Yunnan       | 23°30' N | 99°50' E  | Apr. 2018 | Field surveys  |
| MED | Chuxiong, Yunnan      | 25°45' N | 101°45' E | Sep. 2016 | Hu et al. 2018 |
| MED | Chuxiong, Yunnan      | 25°44' N | 101°50' E | Sep. 2016 | Hu et al. 2018 |
| MED | Chuxiong, Yunnan      | 25°49' N | 101°44' E | Sep. 2016 | Hu et al. 2018 |
| MED | Chuxiong, Yunnan      | 25°51' N | 101°46' E | Sep. 2016 | Hu et al. 2018 |
| MED | Chuxiong, Yunnan      | 25°42' N | 101°53' E | Sep. 2016 | Hu et al. 2018 |
| MED | Chuxiong, Yunnan      | 25°52' N | 101°52' E | Sep. 2016 | Hu et al. 2018 |
| MED | Chuxiong, Yunnan      | 25°57' N | 101°52' E | Sep. 2016 | Hu et al. 2018 |
| MED | Chuxiong, Yunnan      | 25°55' N | 101°51' E | Sep. 2016 | Hu et al. 2018 |
| MED | Chuxiong, Yunnan      | 25°50' N | 101°50' E | Sep. 2016 | Hu et al. 2018 |
| MED | Chuxiong, Yunnan      | 25°46' N | 101°51' E | Sep. 2016 | Hu et al. 2018 |
| MED | Chuxiong, Yunnan      | 25°48' N | 101°49' E | Sep. 2016 | Hu et al. 2018 |
| MED | Honghe, Yunnan        | 23°30' N | 103°24' E | Jun. 2017 | Field surveys  |
| MED | Honghe, Yunnan        | 24°03' N | 103°23' E | May. 2014 | Hu et al. 2018 |
| MED | Honghe, Yunnan        | 23°30' N | 103°20' E | May. 2014 | Hu et al. 2018 |
| MED | Honghe, Yunnan        | 23°28' N | 103°19' E | Mar. 2014 | Hu et al. 2018 |
| MED | Honghe, Yunnan        | 23°34' N | 102°26' E | June 2014 | Hu et al. 2018 |
| MED | Honghe, Yunnan        | 23°44' N | 102°25' E | June 2014 | Hu et al. 2018 |
| MED | Honghe, Yunnan        | 23°40' N | 103°15' E | Oct. 2014 | Hu et al. 2018 |
| MED | Honghe, Yunnan        | 23°44' N | 103°15' E | Mar. 2014 | Hu et al. 2018 |
| MED | Honghe, Yunnan        | 23°43' N | 105°15' E | Mar. 2014 | Hu et al. 2018 |
| MED | Honghe, Yunnan        | 22°38' N | 103°57' E | Oct. 2014 | Hu et al. 2018 |
| MED | Honghe, Yunnan        | 22°32' N | 103°57' E | Oct. 2014 | Hu et al. 2018 |
| MED | Honghe, Yunnan        | 23°29' N | 103°24' E | Sep. 2011 | Hu et al. 2014 |
| MED | Honghe, Yunnan        | 23°46' N | 103°15' E | May. 2012 | Hu et al. 2014 |
| MED | Honghe, Yunnan        | 24°06' N | 103°23' E | May. 2012 | Hu et al. 2014 |
| MED | Xishuangbanna, Yunnan | 21°27' N | 101°34' E | Aug. 2016 | Field surveys  |
| MED | Xishuangbanna, Yunnan | 21°40' N | 100°43' E | Apr. 2018 | Field surveys  |
| MED | Xishuangbanna, Yunnan | 21°32' N | 100°40' E | Apr. 2018 | Field surveys  |
| MED | Xishuangbanna, Yunnan | 21°56' N | 100°45' E | Sep. 2016 | Hu et al. 2018 |
| MED | Xishuangbanna, Yunnan | 21°30' N | 101°33' E | Aug. 2012 | Hu et al. 2014 |
| MED | Xishuangbanna, Yunnan | 21°59' N | 100°16' E | Aug. 2012 | Hu et al. 2014 |
| MED | Xishuangbanna, Yunnan | 22°24' N | 101°23' E | Aug. 2012 | Hu et al. 2014 |
| MED | Dehong, Yunnan        | 24°01' N | 97°51' E  | Apr. 2018 | Field surveys  |
| MED | Xi'an, Shaanxi        | 34°10' N | 109°08' E | Sep. 2016 | Field surveys  |
| MED | Xi'an, Shaanxi        | 34°06' N | 108°29' E | Aug. 2017 | Field surveys  |
| MED | Baoji, Shaanxi        | 34°21' N | 107°27' E | Aug. 2016 | Field surveys  |
| MED | Baoji, Shaanxi        | 34°23' N | 107°23' E | Aug. 2017 | Field surveys  |
| MED | Yan'an, Shaanxi       | 36°52' N | 109°20' E | Aug. 2016 | Field surveys  |
| MED | Yan'an, Shaanxi       | 36°55' N | 109°23' E | Aug. 2017 | Field surveys  |
| MED | Hanzhong, Shaanxi     | 33°05' N | 107°09' E | Aug. 2016 | Field surveys  |
| MED | Yulin, Shaanxi        | 37°59' N | 109°51' E | Aug. 2016 | Field surveys  |
| MED | Yulin, Shaanxi        | 38°18' N | 109°33' E | Aug. 2017 | Field surveys  |
| MED | Yulin, Shaanxi        | 38°18' N | 109°38' E | Aug. 2017 | Field surveys  |

|     |                    |          |           |           |                 |
|-----|--------------------|----------|-----------|-----------|-----------------|
| MED | Lanzhou, Gansu     | 35°51' N | 104°08' E | Sep. 2016 | Field surveys   |
| MED | Lanzhou, Gansu     | 35°50' N | 104°07' E | Sep. 2016 | Field surveys   |
| MED | Lanzhou, Gansu     | 36°06' N | 103°41' E | Aug. 2018 | Field surveys   |
| MED | Lanzhou, Gansu     | 36°07' N | 103°38' E | Aug. 2018 | Field surveys   |
| MED | Tianshui, Gansu    | 34°42' N | 105°40' E | Aug. 2016 | Field surveys   |
| MED | Tianshui, Gansu    | 34°31' N | 106°03' E | Aug. 2016 | Field surveys   |
| MED | Zhangye, Gansu     | 39°03' N | 100°08' E | Aug. 2016 | Field surveys   |
| MED | Zhangye, Gansu     | 38°55' N | 100°27' E | Aug. 2018 | Field surveys   |
| MED | Jiuquan, Gansu     | 39°45' N | 98°32' E  | Aug. 2016 | Field surveys   |
| MED | Jiuquan, Gansu     | 40°29' N | 95°49' E  | Jul. 2017 | Field surveys   |
| MED | Jiuquan, Gansu     | 40°31' N | 95°46' E  | Aug. 2018 | Field surveys   |
| MED | Yinchuan, Ningxia  | 38°28' N | 106°22' E | Sep. 2016 | Field surveys   |
| MED | Guyuan, Ningxia    | 36°03' N | 106°17' E | Sep. 2016 | Field surveys   |
| MED | Zhongwei, Ningxia  | 37°31' N | 105°16' E | Sep. 2016 | Field surveys   |
| MED | Urumqi, Xinjiang   | 44°01' N | 87°26' E  | Aug. 2016 | Field surveys   |
| MED | Urumqi, Xinjiang   | 43°48' N | 87°34' E  | May. 2016 | Jia et al. 2021 |
| MED | Urumqi, Xinjiang   | 45°29' N | 84°57' E  | May. 2016 | Jia et al. 2021 |
| MED | Tulufan, Xinjiang  | 42°40' N | 89°15' E  | Jul. 2016 | Field surveys   |
| MED | Tulufan, Xinjiang  | 42°54' N | 89°29' E  | Jul. 2016 | Field surveys   |
| MED | Tulufan, Xinjiang  | 42°57' N | 89°11' E  | Aug. 2016 | Field surveys   |
| MED | Tulufan, Xinjiang  | 42°52' N | 89°19' E  | Jul. 2017 | Field surveys   |
| MED | Tulufan, Xinjiang  | 42°59' N | 89°09' E  | Jun. 2015 | Jia et al. 2021 |
| MED | Tulufan, Xinjiang  | 42°57' N | 89°06' E  | Jun. 2015 | Jia et al. 2021 |
| MED | Tulufan, Xinjiang  | 42°48' N | 88°27' E  | Jun. 2015 | Jia et al. 2021 |
| MED | Tulufan, Xinjiang  | 42°46' N | 88°41' E  | Apr. 2016 | Jia et al. 2021 |
| MED | Tulufan, Xinjiang  | 42°49' N | 88°38' E  | Apr. 2016 | Jia et al. 2021 |
| MED | Tulufan, Xinjiang  | 42°46' N | 89°33' E  | Apr. 2016 | Jia et al. 2021 |
| MED | Tulufan, Xinjiang  | 42°47' N | 89°43' E  | Apr. 2016 | Jia et al. 2021 |
| MED | Tulufan, Xinjiang  | 42°43' N | 89°41' E  | Apr. 2016 | Jia et al. 2021 |
| MED | Hami, Xinjiang     | 42°53' N | 93°27' E  | Aug. 2016 | Field surveys   |
| MED | Hami, Xinjiang     | 42°50' N | 93°28' E  | Aug. 2016 | Field surveys   |
| MED | Hami, Xinjiang     | 43°00' N | 93°35' E  | Apr. 2016 | Jia et al. 2021 |
| MED | Changji, Xinjiang  | 44°00' N | 87°18' E  | May. 2016 | Jia et al. 2021 |
| MED | Changji, Xinjiang  | 44°09' N | 88°01' E  | Mar. 2017 | Jia et al. 2021 |
| MED | Bortala, Xinjiang  | 45°10' N | 82°33' E  | Sep. 2016 | Jia et al. 2021 |
| MED | Bayingol, Xinjiang | 41°46' N | 86°08' E  | Mar. 2016 | Jia et al. 2021 |
| MED | Kashi, Xinjiang    | 37°40' N | 76°13' E  | Jun. 2018 | Field surveys   |
| MED | Kashi, Xinjiang    | 38°24' N | 77°17' E  | Sep. 2015 | Jia et al. 2021 |
| MED | Kashi, Xinjiang    | 39°24' N | 75°54' E  | Jul. 2015 | Jia et al. 2021 |
| MED | Kashi, Xinjiang    | 38°21' N | 77°10' E  | Aug. 2016 | Jia et al. 2021 |
| MED | Kashi, Xinjiang    | 38°17' N | 77°11' E  | Aug. 2016 | Jia et al. 2021 |
| MED | Kashi, Xinjiang    | 39°24' N | 76°08' E  | Sep. 2015 | Jia et al. 2021 |
| MED | Kashi, Xinjiang    | 39°14' N | 76°22' E  | Sep. 2015 | Jia et al. 2021 |
| MED | Kashi, Xinjiang    | 38°18' N | 77°56' E  | Apr. 2016 | Jia et al. 2021 |



|     |                   |          |          |           |                 |
|-----|-------------------|----------|----------|-----------|-----------------|
| MED | Hetian, Xinjiang  | 37°14' N | 79°41' E | Aug. 2016 | Jia et al. 2021 |
| MED | Yili, Xinjiang    | 44°14' N | 80°51' E | Aug. 2018 | Field surveys   |
| MED | Yili, Xinjiang    | 44°11' N | 80°39' E | Mar. 2018 | Field surveys   |
| MED | Yili, Xinjiang    | 43°51' N | 81°25' E | May. 2015 | Jia et al. 2021 |
| MED | Shihezi, Xinjiang | 44°18' N | 86°04' E | May. 2016 | Jia et al. 2021 |
| MED | Alaer, Xinjiang   | 40°32' N | 81°16' E | Mar. 2017 | Jia et al. 2021 |

<sup>1</sup>References cited in Table S1:

- Hu, J.; Jiang, Z.L.; Nardi, F.; Liu, Y.Y.; Luo, X.R.; Li, H.X.; Zhang, Z.K. Members of *Bemisia tabaci* (Hemiptera: Aleyrodidae) Cryptic Species and the Status of Two Invasive Alien Species in the Yunnan Province (China). *Journal of Insect Science* 2014, 14, 1-8.
- Hu, J.; Zhang, X.; Jiang, Z.; Zhang, F.; Liu, Y.; Li, Z.; Zhang, Z. New putative cryptic species detection and genetic network analysis of *Bemisia tabaci* (Hemiptera: Aleyrodidae) in China based on mitochondrial COI sequences. *Mitochondrial DNA A DNA Mapp Seq Anal* 2018, 29, 474-484.
- Jia, Z.Z.; Fu, K.Y.; Guo, W.C.; Jiang, W.H.; Ahmat, T.; Ding, X.H.; He, J.; Wang, X.W. CAP Analysis of the Distribution of the Introduced *Bemisia tabaci* (Hemiptera: Aleyrodidae) Species Complex in Xinjiang, China and the Southerly Expansion of the Mediterranean Species. *Journal of Insect Science* 2021, 21, 14.

**Table S2.** The correlation matrix of environmental variables.

[illegible]

**Table S3.** Potential suitable areas for MEAM1 and MED of the *Bemisia tabaci* species complex in China under current and future climate scenarios.

| Cryptic species | Climate scenarios and periods |       | Area (10 <sup>4</sup> km <sup>2</sup> ) |                     |                 |        |
|-----------------|-------------------------------|-------|-----------------------------------------|---------------------|-----------------|--------|
|                 |                               |       | Slightly suitable                       | Moderately suitable | Highly suitable | Total  |
| MEAM1           | Current                       |       | 101.66                                  | 60.84               | 26.18           | 188.67 |
|                 | SSP1-2.6                      | 2030s | 88.09                                   | 72.96               | 70.83           | 231.88 |
|                 |                               | 2050s | 100.51                                  | 79.61               | 89.08           | 269.19 |
|                 |                               | 2070s | 103.88                                  | 69.76               | 52.76           | 226.40 |
|                 |                               | 2090s | 100.40                                  | 78.40               | 75.31           | 254.11 |
|                 | SSP2-4.5                      | 2030s | 109.98                                  | 84.24               | 64.35           | 258.57 |
|                 |                               | 2050s | 109.09                                  | 86.24               | 106.33          | 301.66 |
|                 |                               | 2070s | 105.99                                  | 92.41               | 129.73          | 328.14 |
|                 |                               | 2090s | 103.41                                  | 92.45               | 133.86          | 329.73 |
|                 | SSP3-7.0                      | 2030s | 100.84                                  | 76.13               | 60.16           | 237.14 |
|                 |                               | 2050s | 118.74                                  | 86.16               | 100.35          | 305.25 |
|                 |                               | 2070s | 99.96                                   | 86.15               | 152.35          | 338.46 |
|                 |                               | 2090s | 86.05                                   | 85.47               | 179.52          | 351.05 |
|                 | SSP5-8.5                      | 2030s | 109.14                                  | 80.87               | 83.24           | 273.26 |
|                 |                               | 2050s | 100.92                                  | 86.23               | 115.05          | 302.21 |
|                 |                               | 2070s | 97.92                                   | 84.72               | 145.88          | 328.52 |
|                 |                               | 2090s | 89.82                                   | 86.62               | 176.68          | 353.13 |
| MED             | Current                       |       | 44.67                                   | 58.27               | 51.05           | 153.99 |
|                 | SSP1-2.6                      | 2030s | 57.78                                   | 62.01               | 87.90           | 207.70 |
|                 |                               | 2050s | 51.27                                   | 76.23               | 109.38          | 236.87 |
|                 |                               | 2070s | 55.98                                   | 63.56               | 77.46           | 197.00 |
|                 |                               | 2090s | 58.97                                   | 58.05               | 86.55           | 203.58 |
|                 | SSP2-4.5                      | 2030s | 60.85                                   | 62.93               | 84.95           | 208.72 |
|                 |                               | 2050s | 65.90                                   | 66.22               | 102.01          | 234.13 |
|                 |                               | 2070s | 73.58                                   | 82.73               | 118.86          | 275.18 |
|                 |                               | 2090s | 81.13                                   | 93.72               | 115.99          | 290.84 |
|                 | SSP3-7.0                      | 2030s | 58.23                                   | 61.09               | 84.44           | 203.77 |
|                 |                               | 2050s | 66.38                                   | 79.59               | 107.97          | 253.94 |
|                 |                               | 2070s | 77.43                                   | 86.32               | 135.25          | 299.00 |
|                 |                               | 2090s | 78.41                                   | 100.15              | 155.41          | 333.96 |
|                 | SSP5-8.5                      | 2030s | 58.18                                   | 63.41               | 85.04           | 206.63 |
|                 |                               | 2050s | 71.68                                   | 80.25               | 110.20          | 262.13 |
|                 |                               | 2070s | 74.94                                   | 79.69               | 130.54          | 285.17 |
|                 |                               | 2090s | 75.95                                   | 94.45               | 159.38          | 329.77 |

SSP, shared socioeconomic pathway.

**Table S4.** The geographic coordinates of the distributional centroid of MEAM1 and MED cryptic species of the *Bemisia tabaci* species complex in China under current and future climate scenarios and their migration distance relative to the previous period.

| Cryptic species | Climate scenarios and periods |       | Longitude | Latitude | Distance (km) |
|-----------------|-------------------------------|-------|-----------|----------|---------------|
| MEAM1           | Current                       |       | 103°49'E  | 33°27'N  | —             |
|                 | SSP1-2.6                      | 2030s | 105°02'E  | 32°46'N  | 136.46        |
|                 |                               | 2050s | 104°13'E  | 32°59'N  | 80.51         |
|                 |                               | 2070s | 103°20'E  | 33°38'N  | 109.62        |
|                 |                               | 2090s | 104°06'E  | 33°49'N  | 74.24         |
|                 | SSP2-4.5                      | 2030s | 103°22'E  | 33°45'N  | 53.75         |
|                 |                               | 2050s | 102°47'E  | 34°36'N  | 107.62        |
|                 |                               | 2070s | 103°15'E  | 34°15'N  | 57.57         |
|                 |                               | 2090s | 102°36'E  | 34°34'N  | 70.86         |
|                 | SSP3-7.0                      | 2030s | 103°19'E  | 33°34'N  | 48.23         |
|                 |                               | 2050s | 103°05'E  | 34°00'N  | 52.77         |
|                 |                               | 2070s | 103°10'E  | 34°40'N  | 74.27         |
|                 |                               | 2090s | 102°55'E  | 34°34'N  | 25.14         |
|                 | SSP5-8.5                      | 2030s | 103°13'E  | 34°20'N  | 112.33        |
|                 |                               | 2050s | 103°12'E  | 34°11'N  | 15.84         |
|                 |                               | 2070s | 103°10'E  | 34°18'N  | 13.98         |
|                 |                               | 2090s | 102°53'E  | 34°11'N  | 29.47         |
| MED             | Current                       |       | 109°01'E  | 33°08'N  | —             |
|                 | SSP1-2.6                      | 2030s | 108°60'E  | 32°36'N  | 59.30         |
|                 |                               | 2050s | 108°01'E  | 32°30'N  | 93.54         |
|                 |                               | 2070s | 108°06'E  | 33°33'N  | 117.20        |
|                 |                               | 2090s | 108°18'E  | 34°11'N  | 73.07         |
|                 | SSP2-4.5                      | 2030s | 107°43'E  | 33°18'N  | 123.38        |
|                 |                               | 2050s | 106°13'E  | 34°27'N  | 188.02        |
|                 |                               | 2070s | 107°16'E  | 34°10'N  | 102.04        |
|                 |                               | 2090s | 106°25'E  | 34°49'N  | 105.80        |
|                 | SSP3-7.0                      | 2030s | 108°03'E  | 33°11'N  | 89.62         |
|                 |                               | 2050s | 107°02'E  | 33°20'N  | 97.21         |
|                 |                               | 2070s | 106°55'E  | 34°56'N  | 179.34        |
|                 |                               | 2090s | 106°45'E  | 35°26'N  | 56.51         |
|                 | SSP5-8.5                      | 2030s | 107°09'E  | 33°56'N  | 194.73        |
|                 |                               | 2050s | 107°38'E  | 34°12'N  | 53.65         |
|                 |                               | 2070s | 107°08'E  | 35°04'N  | 106.10        |
|                 |                               | 2090s | 107°01'E  | 35°02'N  | 10.93         |

SSP, shared socioeconomic pathway.

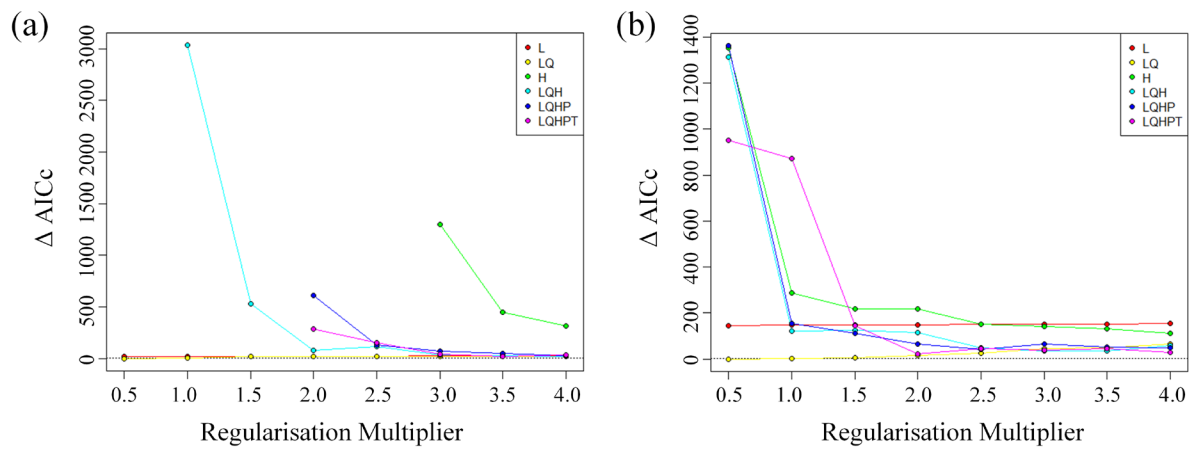

**Figure S1.** ENMeval output for (a) MEAM1 and (b) MED cryptic species of the *Bemisia tabaci* species complex, showing that the optimal parameter combination of feature class and regularization multiplier in the MaxEnt models was: LQ and 0.5, respectively, for both of them. AICc, Akaike information criterion coefficient.

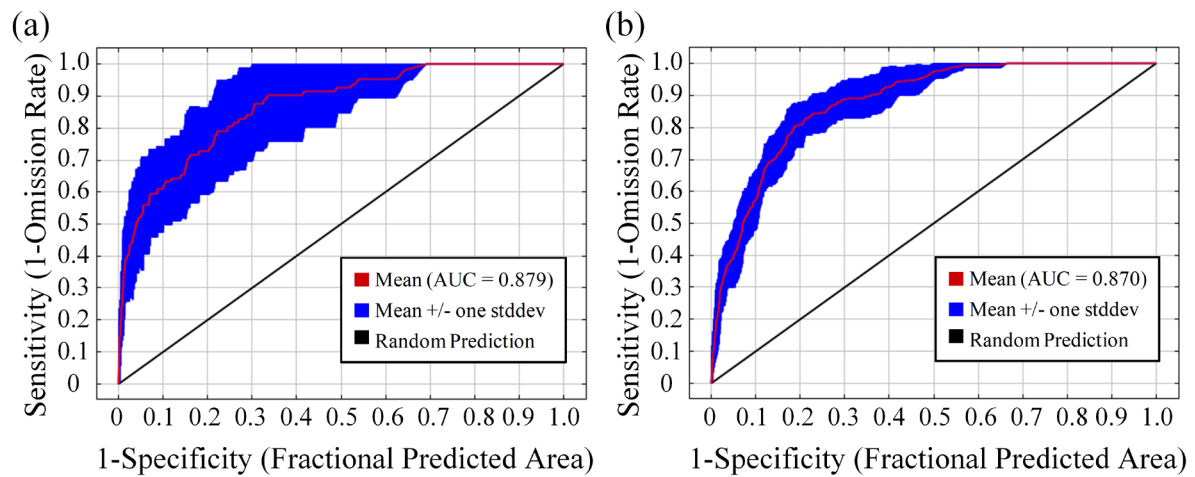

**Figure S2.** Receiver operating characteristic curve verification of the prediction for (a) MEAM1 and (b) MED cryptic species of the *Bemisia tabaci* species complex. AUC, area under the curve.
